# Supplementary material
Source: publisher figshare collection journal article supplement (https://sage.figshare.com/ndownloader/files/11903852)
Supplement: Supplementary file 1 [file 11903852]

Supplementary Fig. 2:

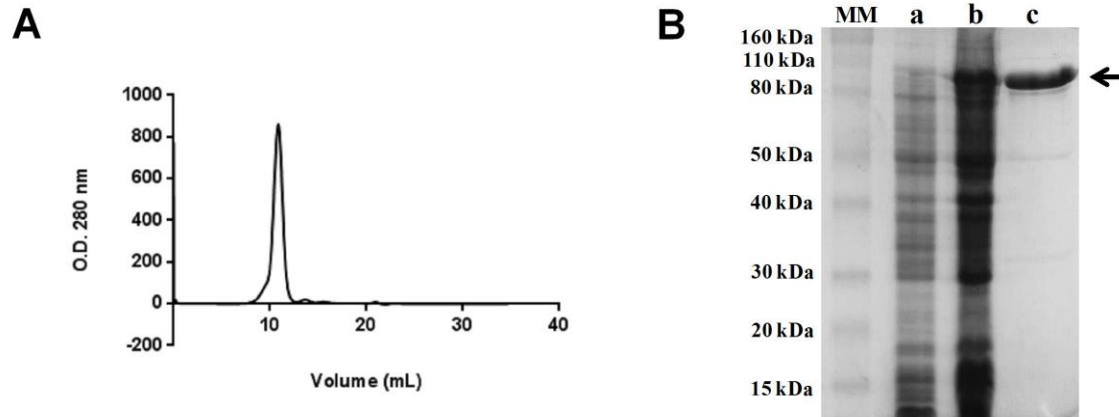

Supplementary Figure 2. The rLPG3 purification. A, Chromatogram from rLPG3 purification; Supernatant of soluble proteins from *E. coli* Rosetta (DE3) strain cells transformed with pET 28 constructs with LPG3 gene was submitted to affinity chromatography on the nickel, heparin, and Superdex 200 columns, as described in the methodology; B, 12% SDS-PAGE of purified rLPG3; 15  $\mu$ g of protein were submitted to SDS-PAGE, and the gel was stained by Coomassie blue, as described in the methodology. MM: Molecular mass standard; a. Non-induced cultures; b. Induced cultures with 500 mmol.L<sup>-1</sup> imidazole; c. Purified rHBPLc.
