# Supplementary material
Source: publisher figshare collection journal article supplement (https://sage.figshare.com/ndownloader/files/11903852)
Supplement: Supplementary file 2 [file 11903852]

# RAMPAGE: Assessment of the Ramachandran Plot

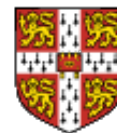

File: LPG3.pdb

For high-resolution output, you can download a  [Adobe PDF](#) or [PostScript](#) file

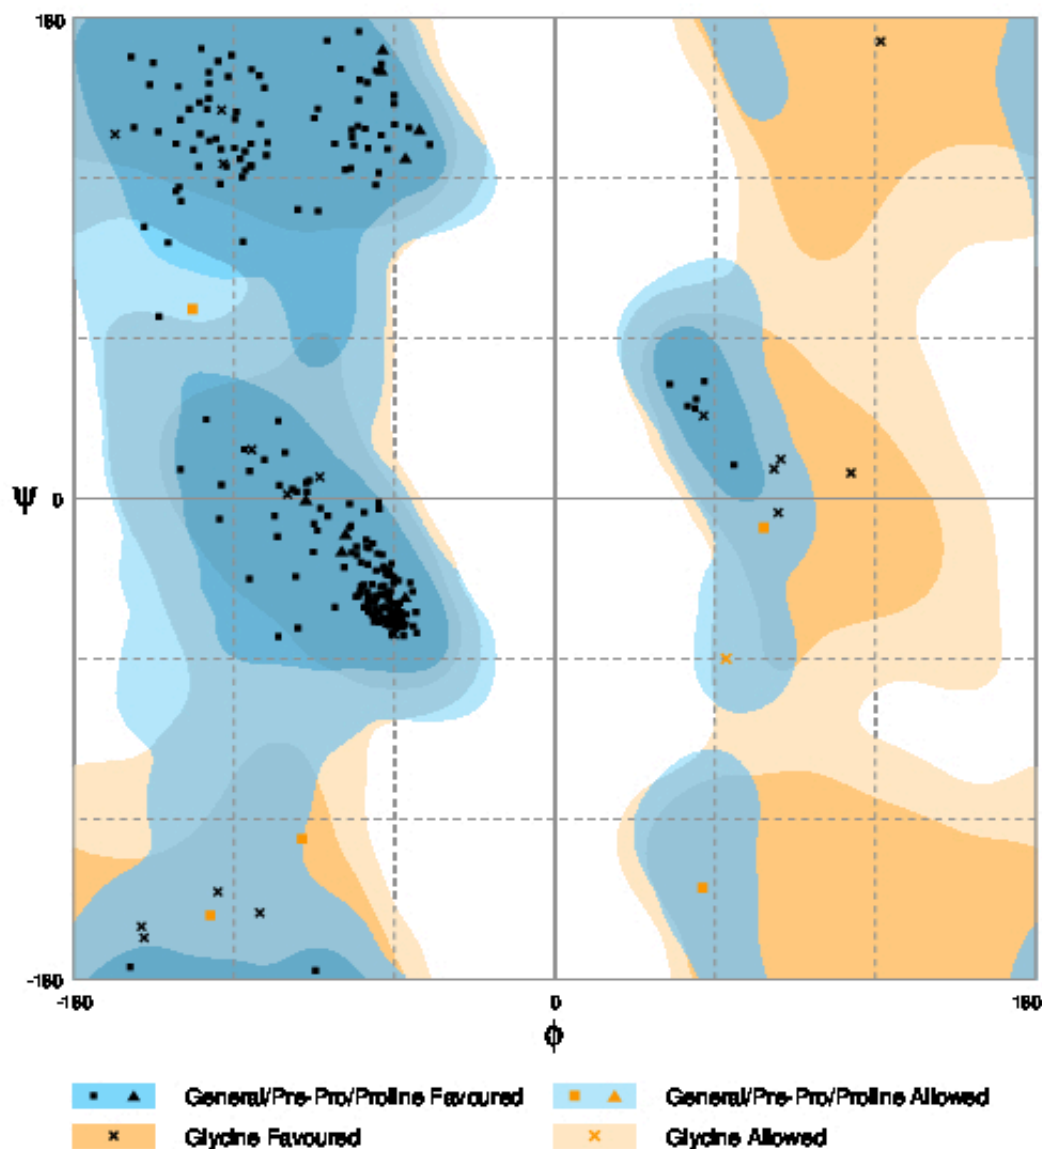

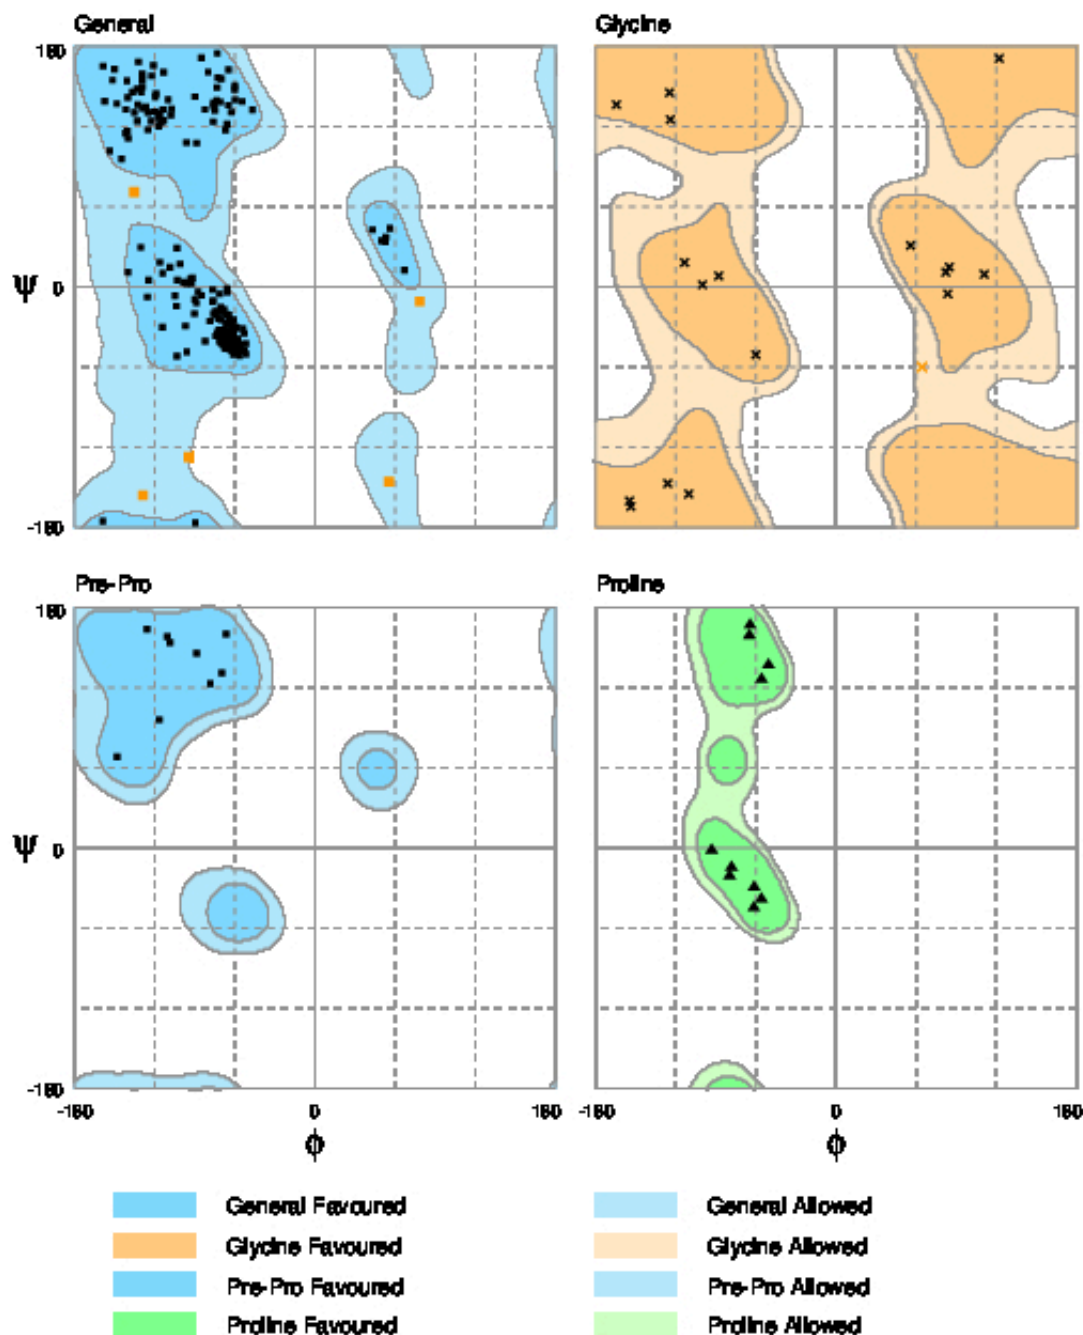

## Evaluation of residues

```

Residue [A 69 :CYS] ( 55.42, -145.70) in Allowed region
Residue [A 103 :VAL] (-128.83, -156.00) in Allowed region
Residue [A 114 :ASN] ( 78.33, -10.86) in Allowed region
Residue [A 220 :SER] (-94.49, -127.38) in Allowed region
Residue [A 275 :ARG] (-135.48, 70.92) in Allowed region
Residue [A 289 :GLY] ( 64.28, -59.97) in Allowed region
Number of residues in favoured region (~98.0% expected) : 252 ( 97.7%)
Number of residues in allowed region (~2.0% expected) : 6 ( 2.3%)
Number of residues in outlier region : 0 ( 0.0%)

```

**RAMPAGE** by Paul de Bakker and Simon Lovell.

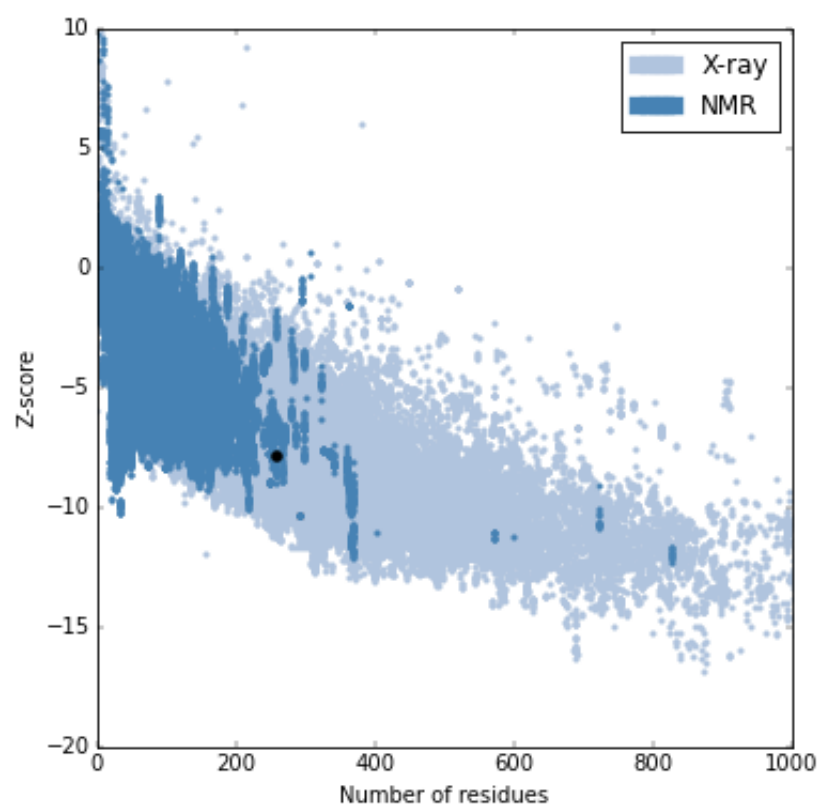

## Local model quality

[HELP](#)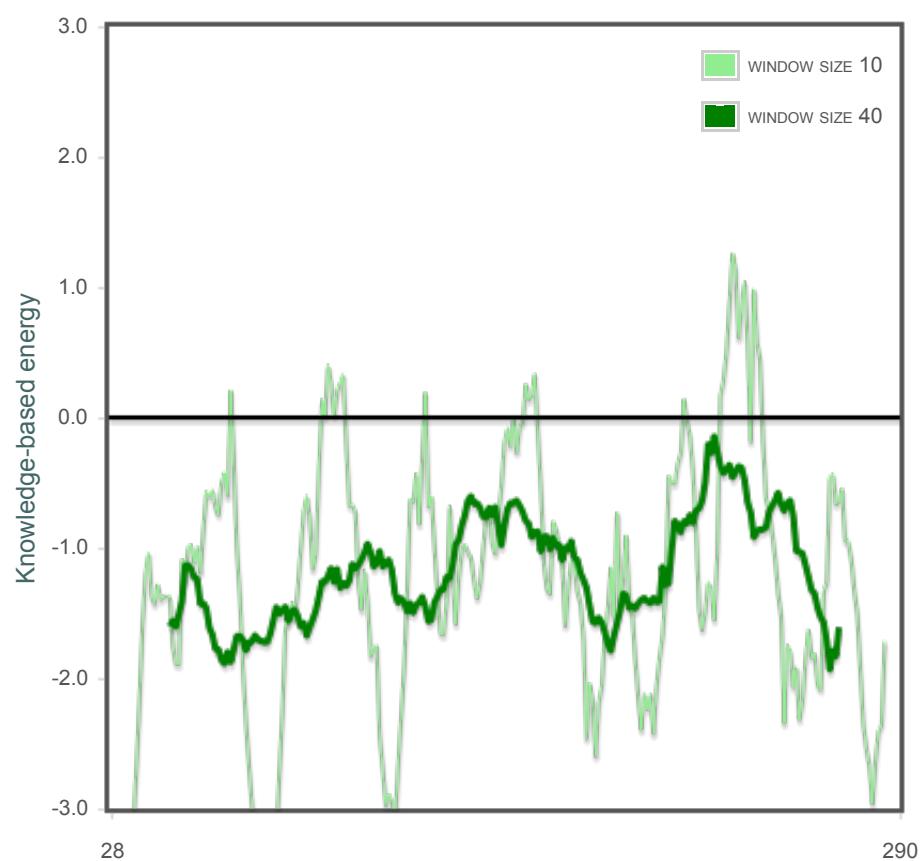

## Sequence position

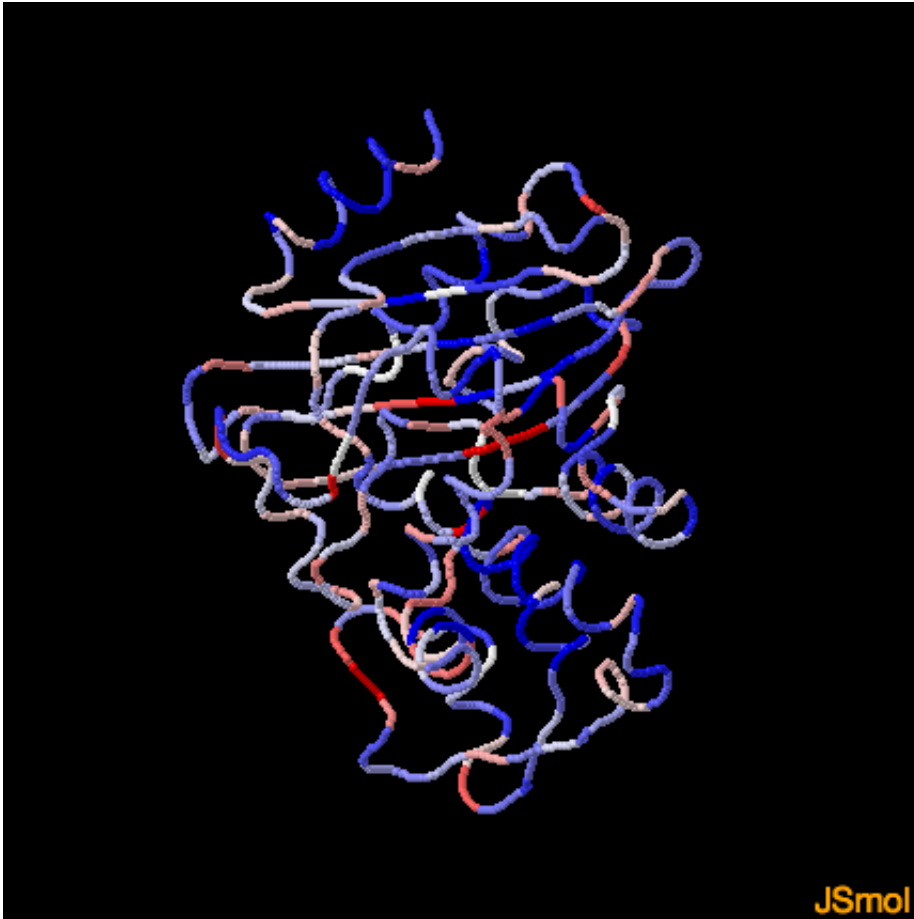

Lowest energy  Highest energy

Please cite the following articles if you publish results using ProSA-web:

- Wiederstein & Sippl (2007)  
ProSA-web: interactive web service for the recognition of errors in three-dimensional structures of proteins.  
*Nucleic Acids Research* 35, W407-W410. [[view](#)]
- Sippl, M.J. (1993)  
Recognition of Errors in Three-Dimensional Structures of Proteins.  
*Proteins* 17, 355-362. [[view](#)]

This site is maintained by Markus Wiederstein. For comments and suggestions please contact [prosa@came.sbg.ac.at](mailto:prosa@came.sbg.ac.at).

# Chi1-Chi2 plots

## LPG3 - Chain A

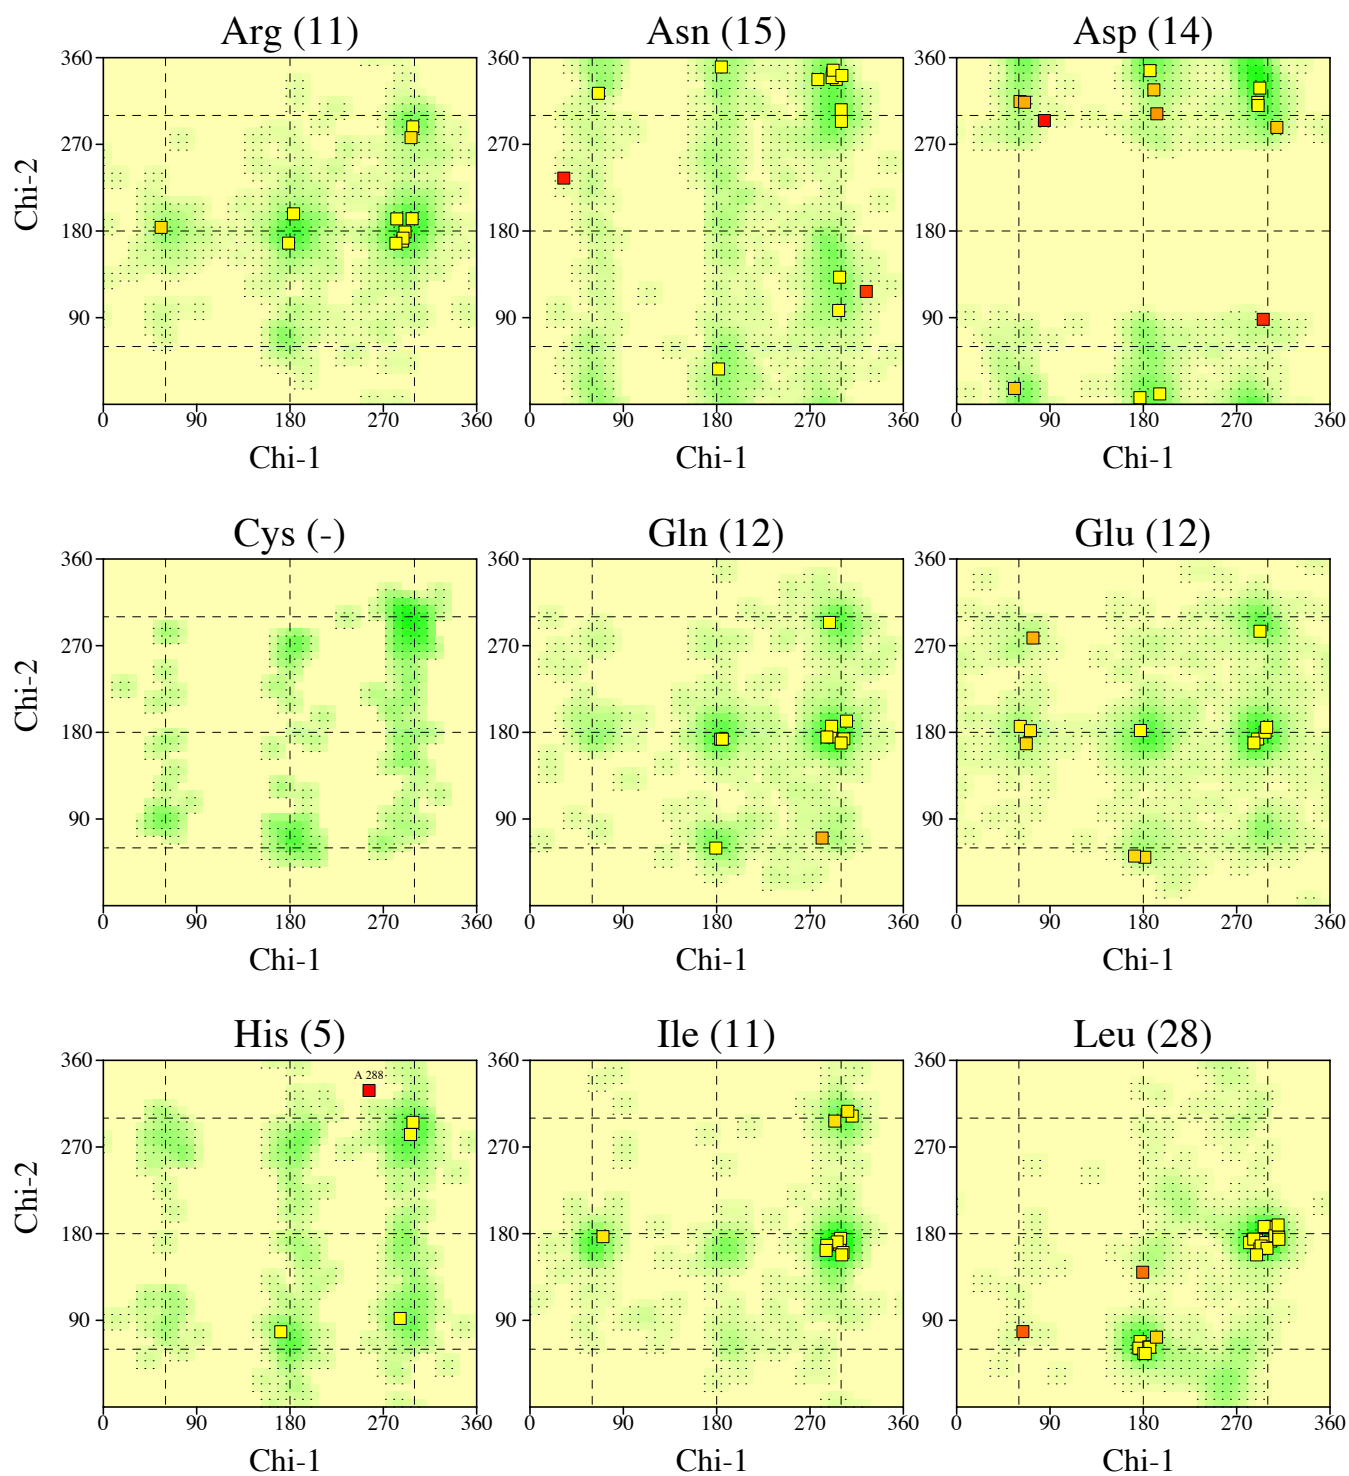

Numbers of residues are shown in brackets. Those in unfavourable conformations (score < -3.00) are labelled. Shading shows favourable conformations as obtained from an analysis of 163 structures at resolution 2.0Å or better.

## Chi1-Chi2 plots

## LPG3 - Chain A

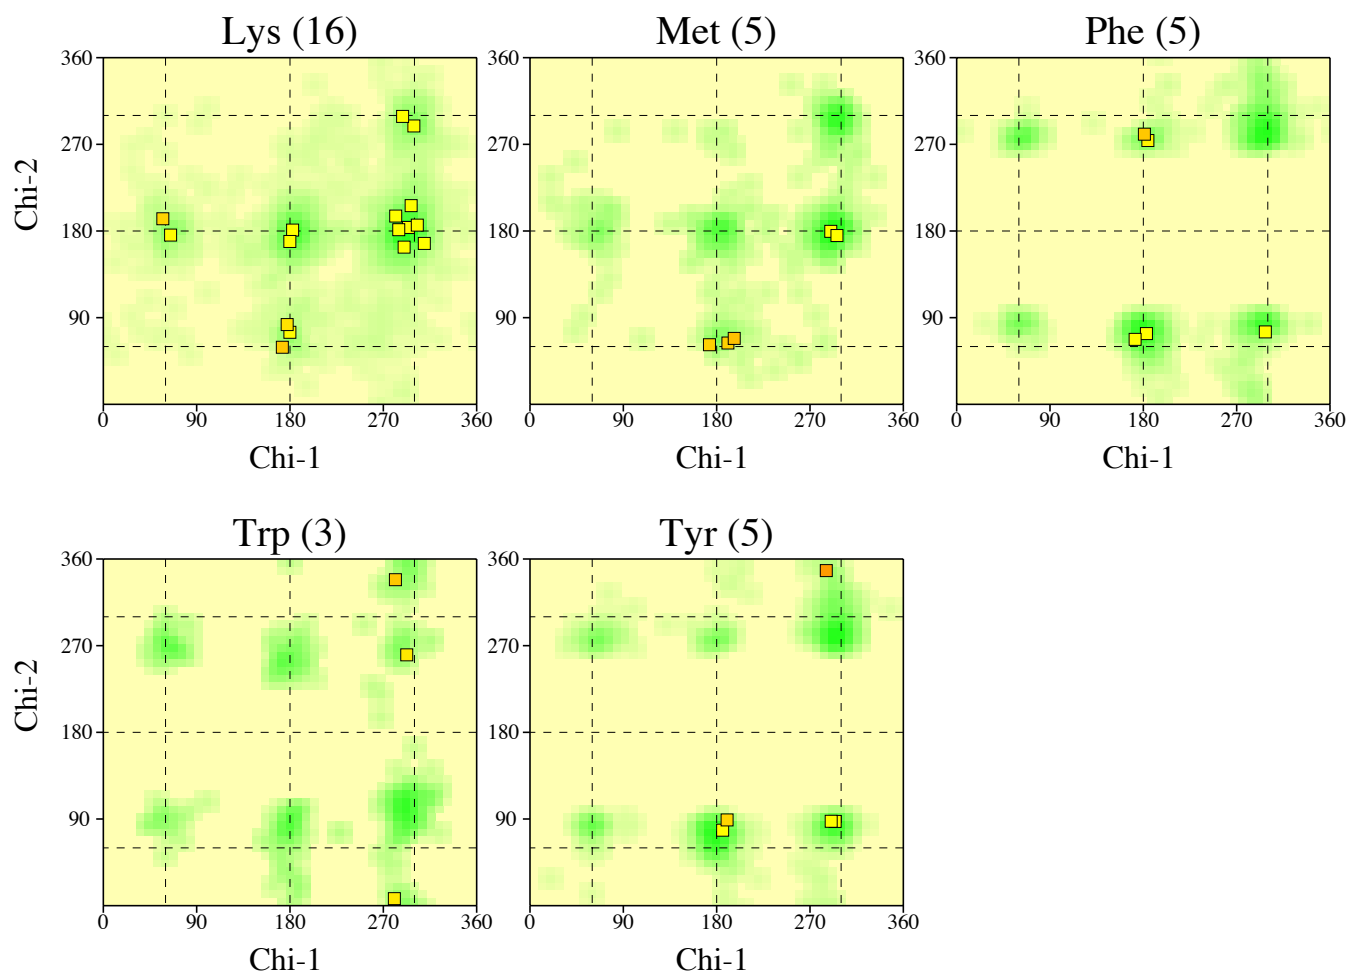

Numbers of residues are shown in brackets. Those in unfavourable conformations (score < -3.00) are labelled. Shading shows favourable conformations as obtained from an analysis of 163 structures at resolution 2.0Å or better.

# Main-chain parameters

## LPG3 - Chain A

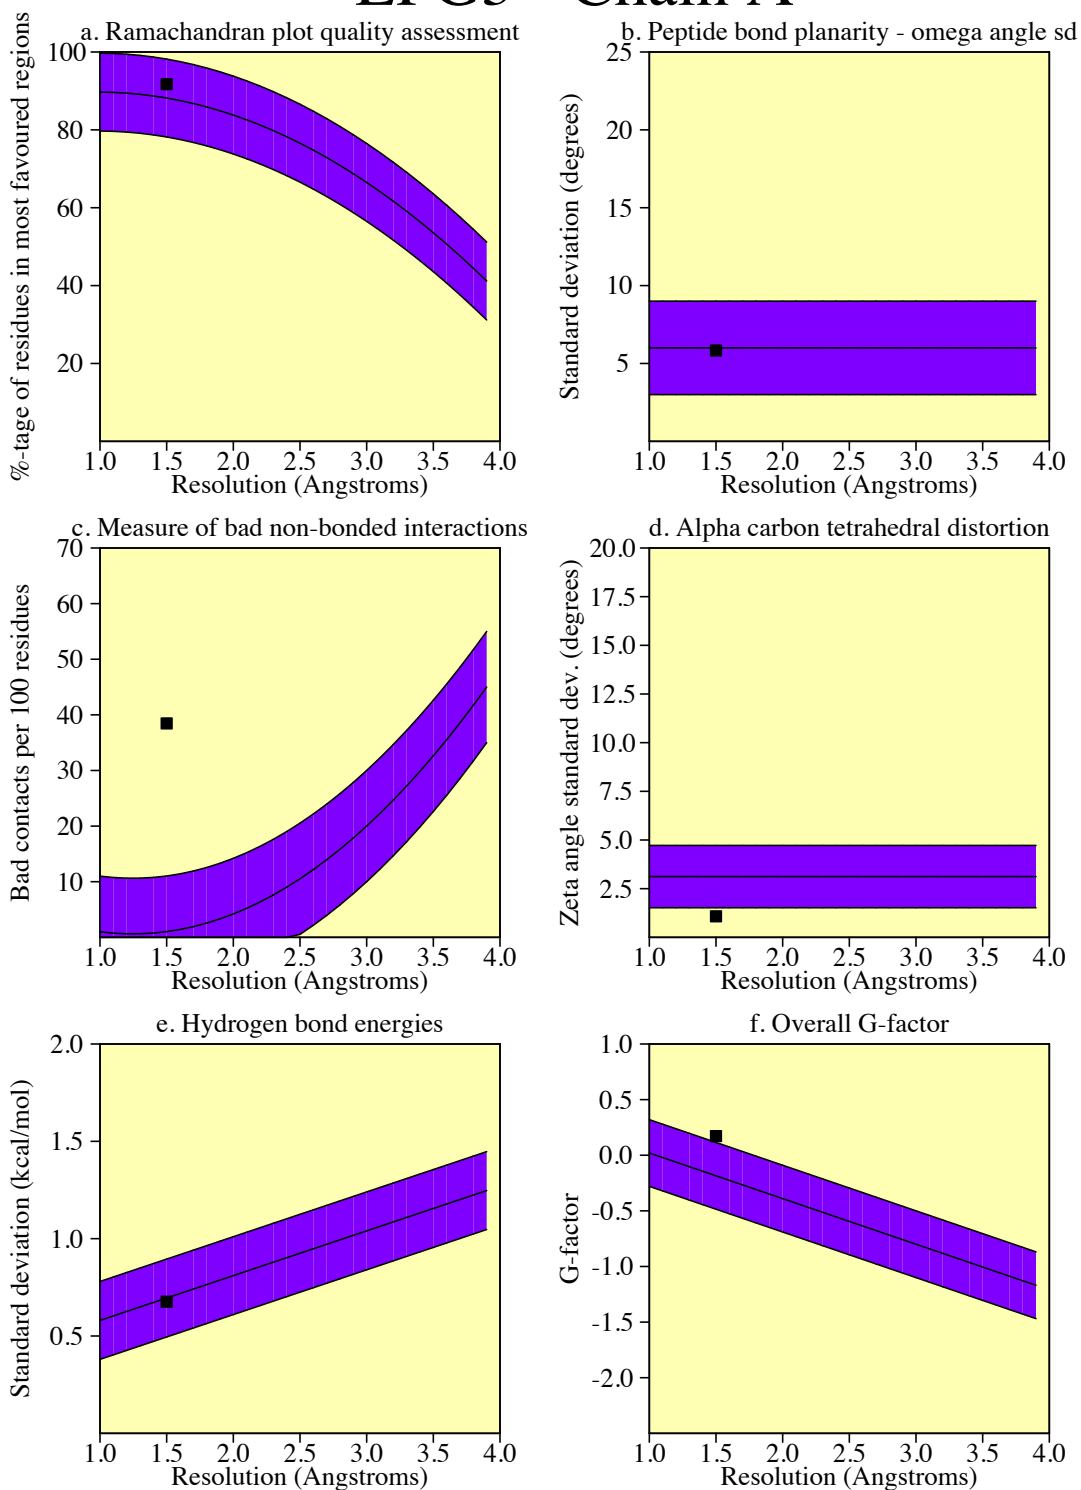

Plot statistics

| Stereochemical parameter       | No. of data pts | Parameter value | Comparison values<br>Typical value | Band width | No. of band widths from mean |        |
|--------------------------------|-----------------|-----------------|------------------------------------|------------|------------------------------|--------|
| a. %-tage residues in A, B, L  | 230             | 91.7            | 88.2                               | 10.0       | 0.4                          | Inside |
| b. Omega angle st dev          | 258             | 5.8             | 6.0                                | 3.0        | -0.1                         | Inside |
| c. Bad contacts / 100 residues | 100             | 38.5            | 1.0                                | 10.0       | 3.7                          | WORSE  |
| d. Zeta angle st dev           | 242             | 1.1             | 3.1                                | 1.6        | -1.3                         | BETTER |
| e. H-bond energy st dev        | 169             | 0.7             | 0.7                                | 0.2        | -0.1                         | Inside |
| f. Overall G-factor            | 260             | 0.2             | -0.2                               | 0.3        | 1.2                          | BETTER |

# Side-chain parameters

## LPG3 - Chain A

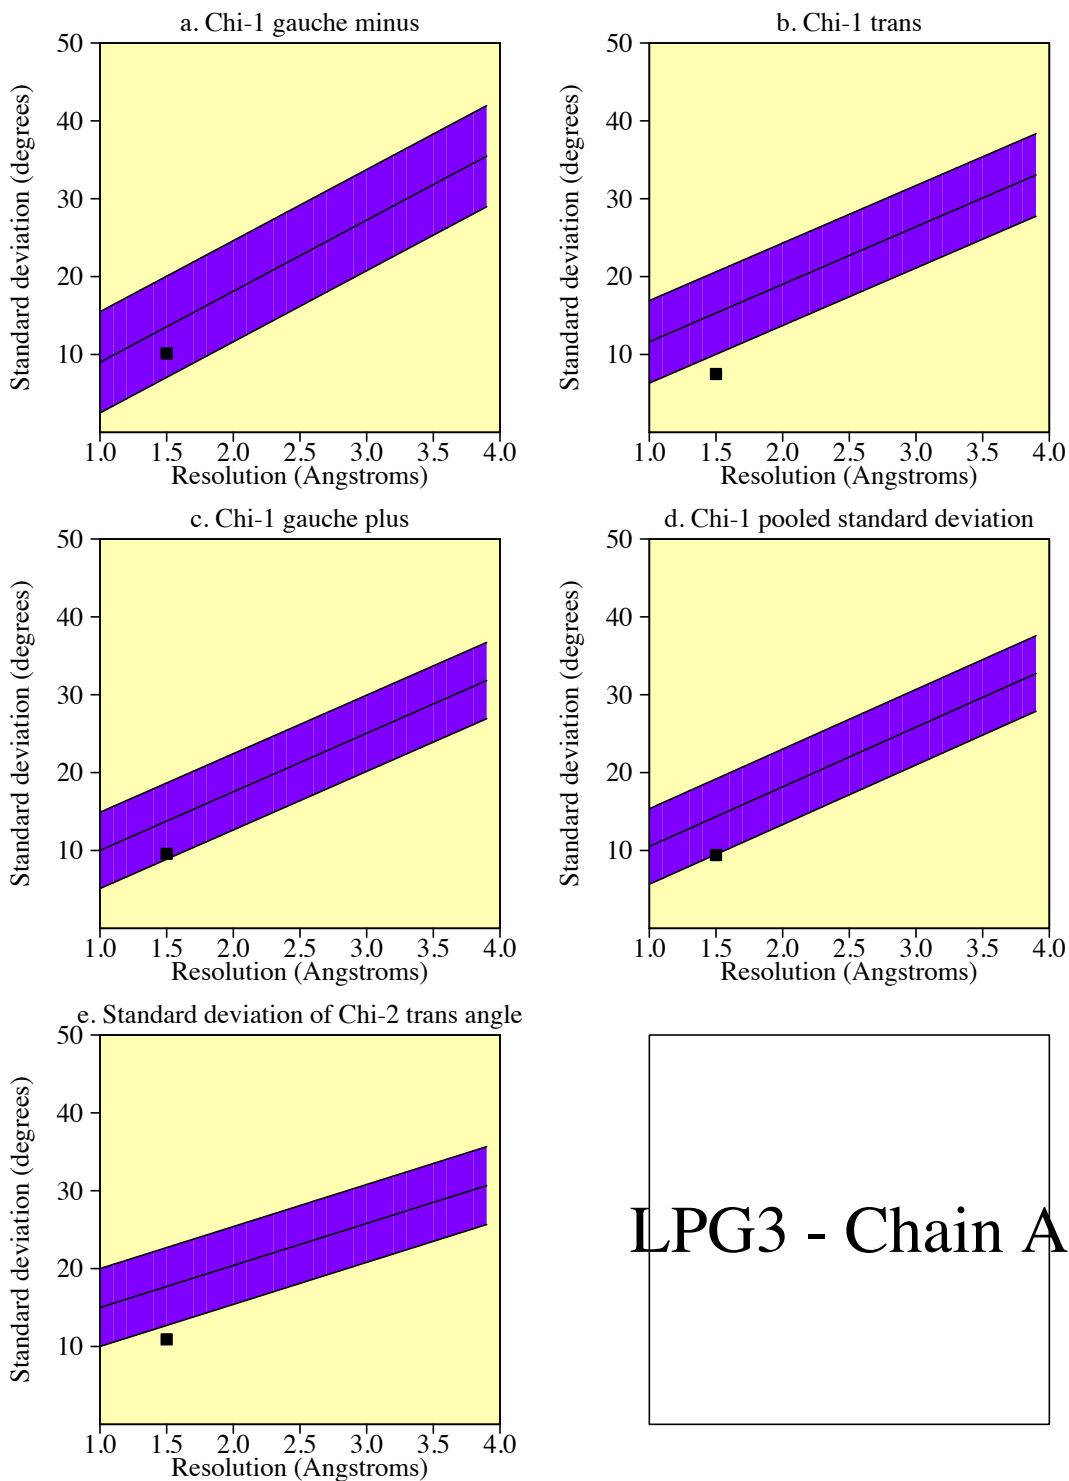

Plot statistics

| Stereochemical parameter     | No. of data pts | Parameter value | Comparison values |            | No. of band widths from mean |        |
|------------------------------|-----------------|-----------------|-------------------|------------|------------------------------|--------|
|                              |                 |                 | Typical value     | Band width |                              |        |
| a. Chi-1 gauche minus st dev | 41              | 10.1            | 13.6              | 6.5        | -0.5                         | Inside |
| b. Chi-1 trans st dev        | 56              | 7.5             | 15.3              | 5.3        | -1.5                         | BETTER |
| c. Chi-1 gauche plus st dev  | 101             | 9.6             | 13.8              | 4.9        | -0.9                         | Inside |
| d. Chi-1 pooled st dev       | 198             | 9.4             | 14.3              | 4.8        | -1.0                         | BETTER |
| e. Chi-2 trans st dev        | 66              | 10.9            | 17.7              | 5.0        | -1.4                         | BETTER |



# Residue properties

## LPG3 - Chain A

a. Absolute deviation from mean Chi-1 value (excl. Pro)

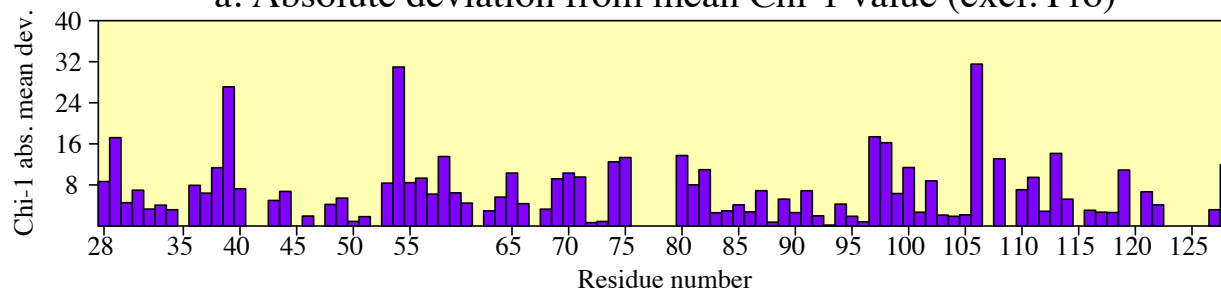

b. Absolute deviation from mean of omega torsion

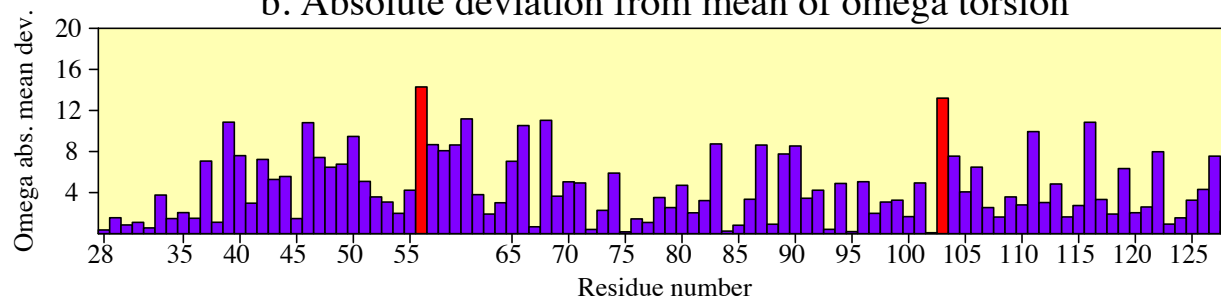

c. C-alpha chirality: abs. deviation of zeta torsion

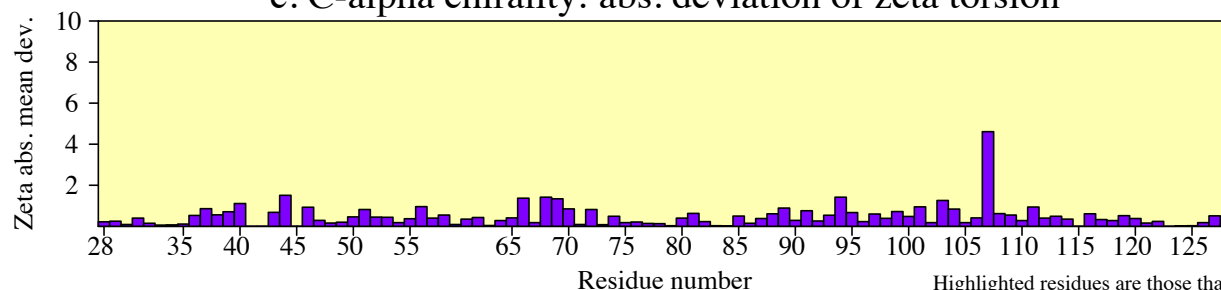

Highlighted residues are those that deviate by more than 2.0 st. devs. from ideal

d. Secondary structure & estimated accessibility

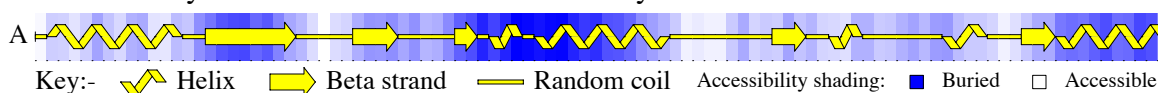

e. Sequence & Ramachandran regions Most favoured Allowed Generous Disallowed

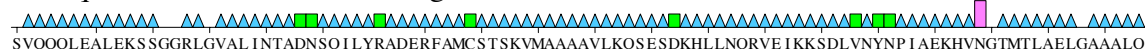

f. Max. deviation (see listing)

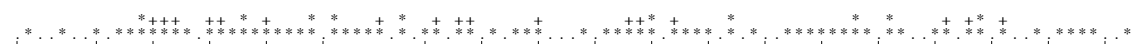

g. G-factors

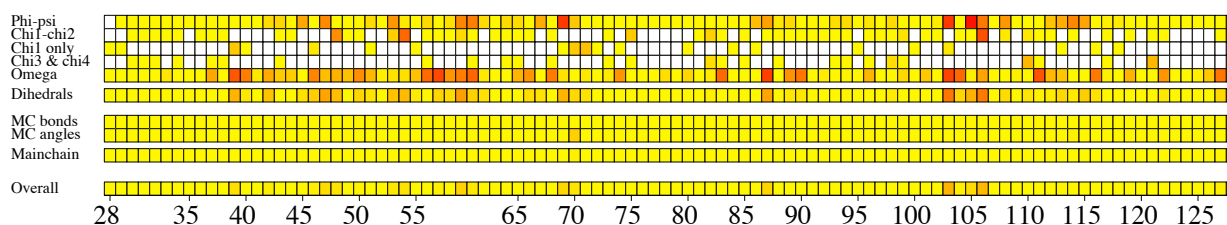

# Residue properties

## LPG3 - Chain A

a. Absolute deviation from mean Chi-1 value (excl. Pro)

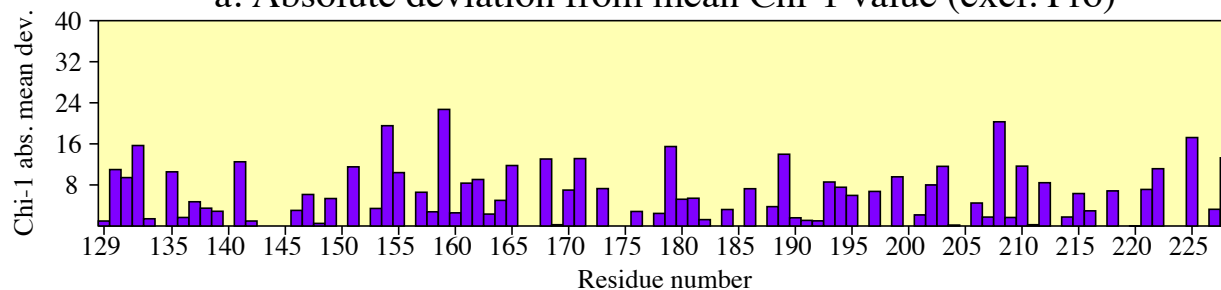

b. Absolute deviation from mean of omega torsion

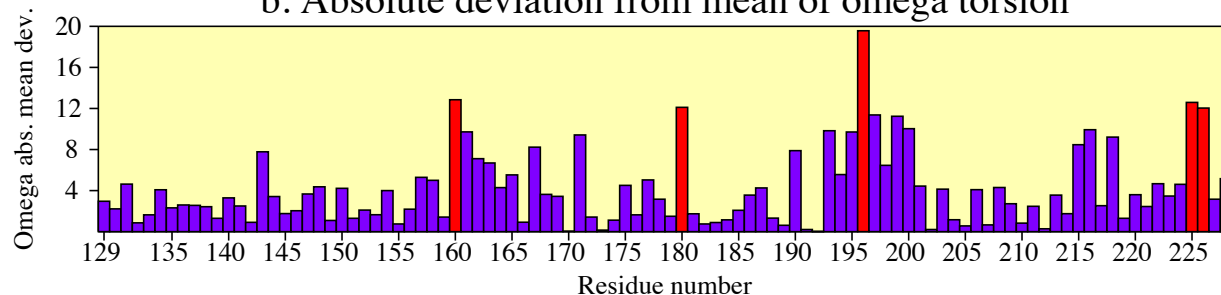

c. C-alpha chirality: abs. deviation of zeta torsion

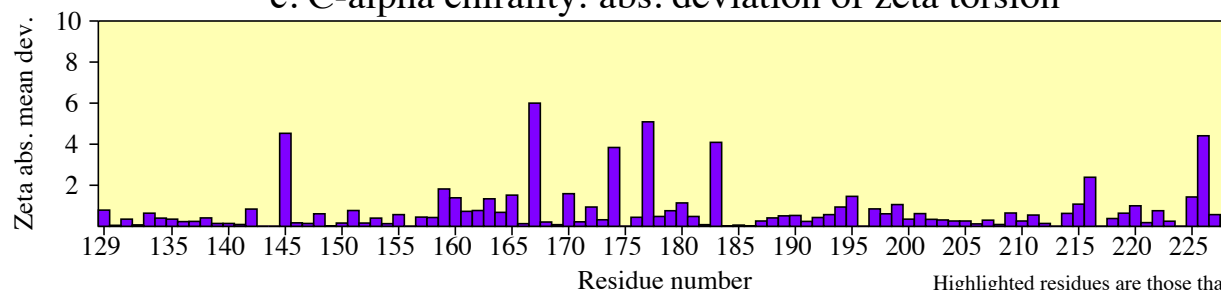

Highlighted residues are those that deviate by more than 2.0 st. devs. from ideal

d. Secondary structure & estimated accessibility

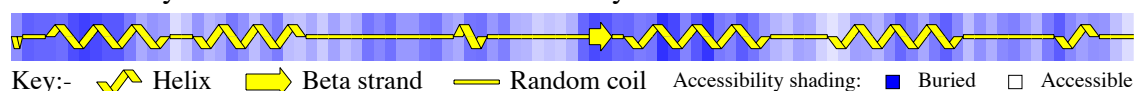

e. Sequence & Ramachandran regions

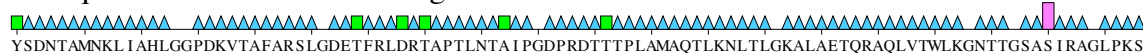

f. Max. deviation (see listing)

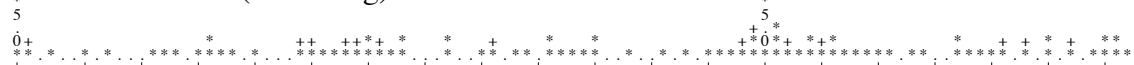

g. G-factors

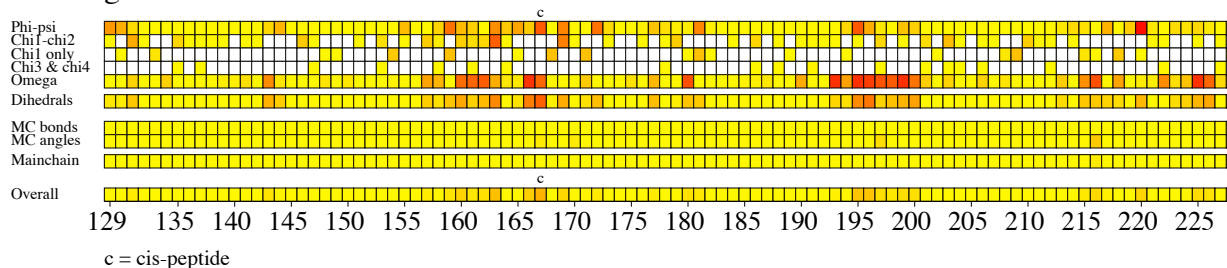

# Residue properties

## LPG3 - Chain A

a. Absolute deviation from mean Chi-1 value (excl. Pro)

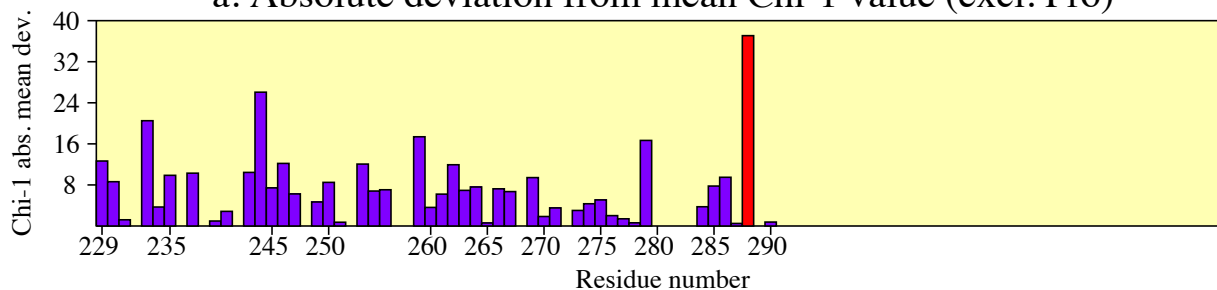

b. Absolute deviation from mean of omega torsion

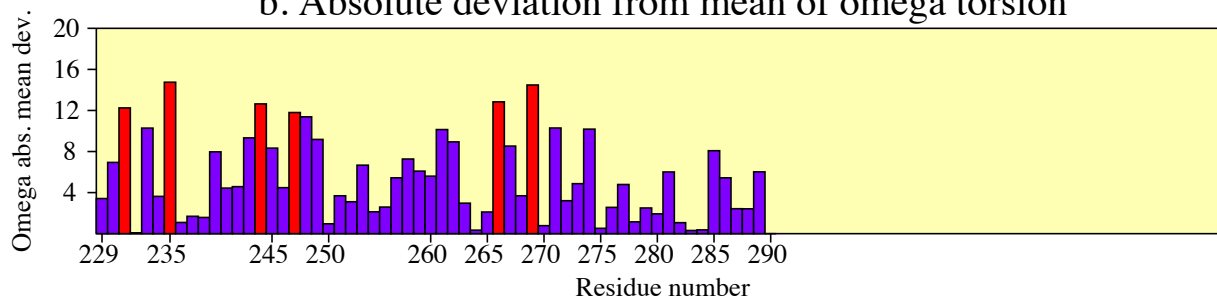

c. C-alpha chirality: abs. deviation of zeta torsion

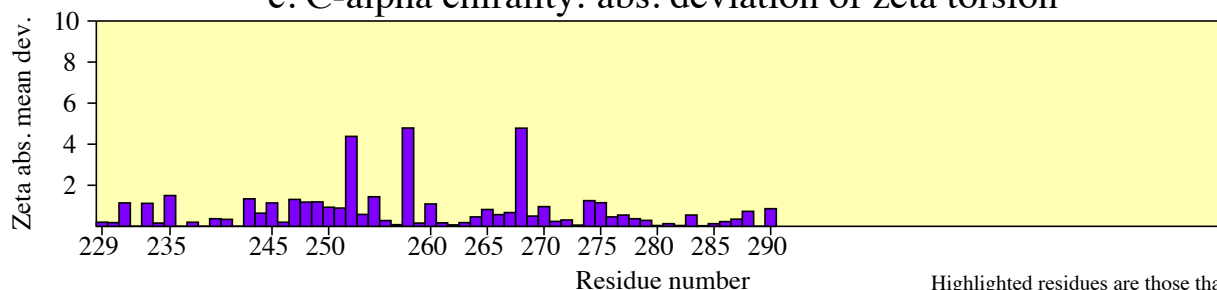

Highlighted residues are those that deviate by more than 2.0 st. devs. from ideal

d. Secondary structure & estimated accessibility

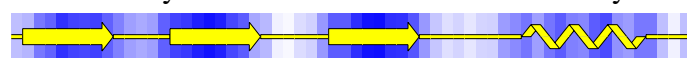

Key:- Helix Beta strand Random coil Accessibility shading: Buried Accessible

e. Sequence & Ramachandran regions Most favoured Allowed Generous Disallowed

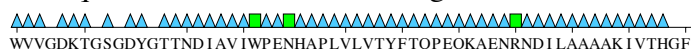

f. Max. deviation (see listing)

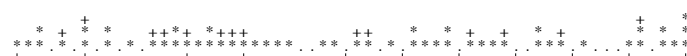

g. G-factors

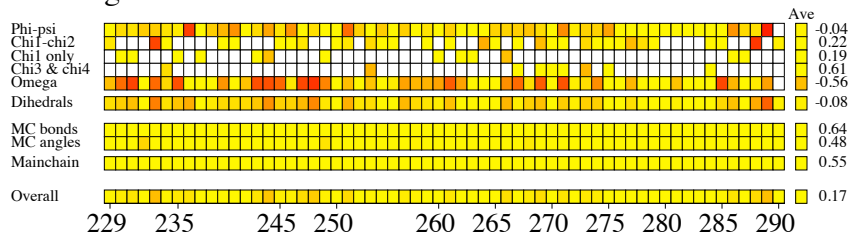

# Main-chain bond lengths

## LPG3 - Chain A

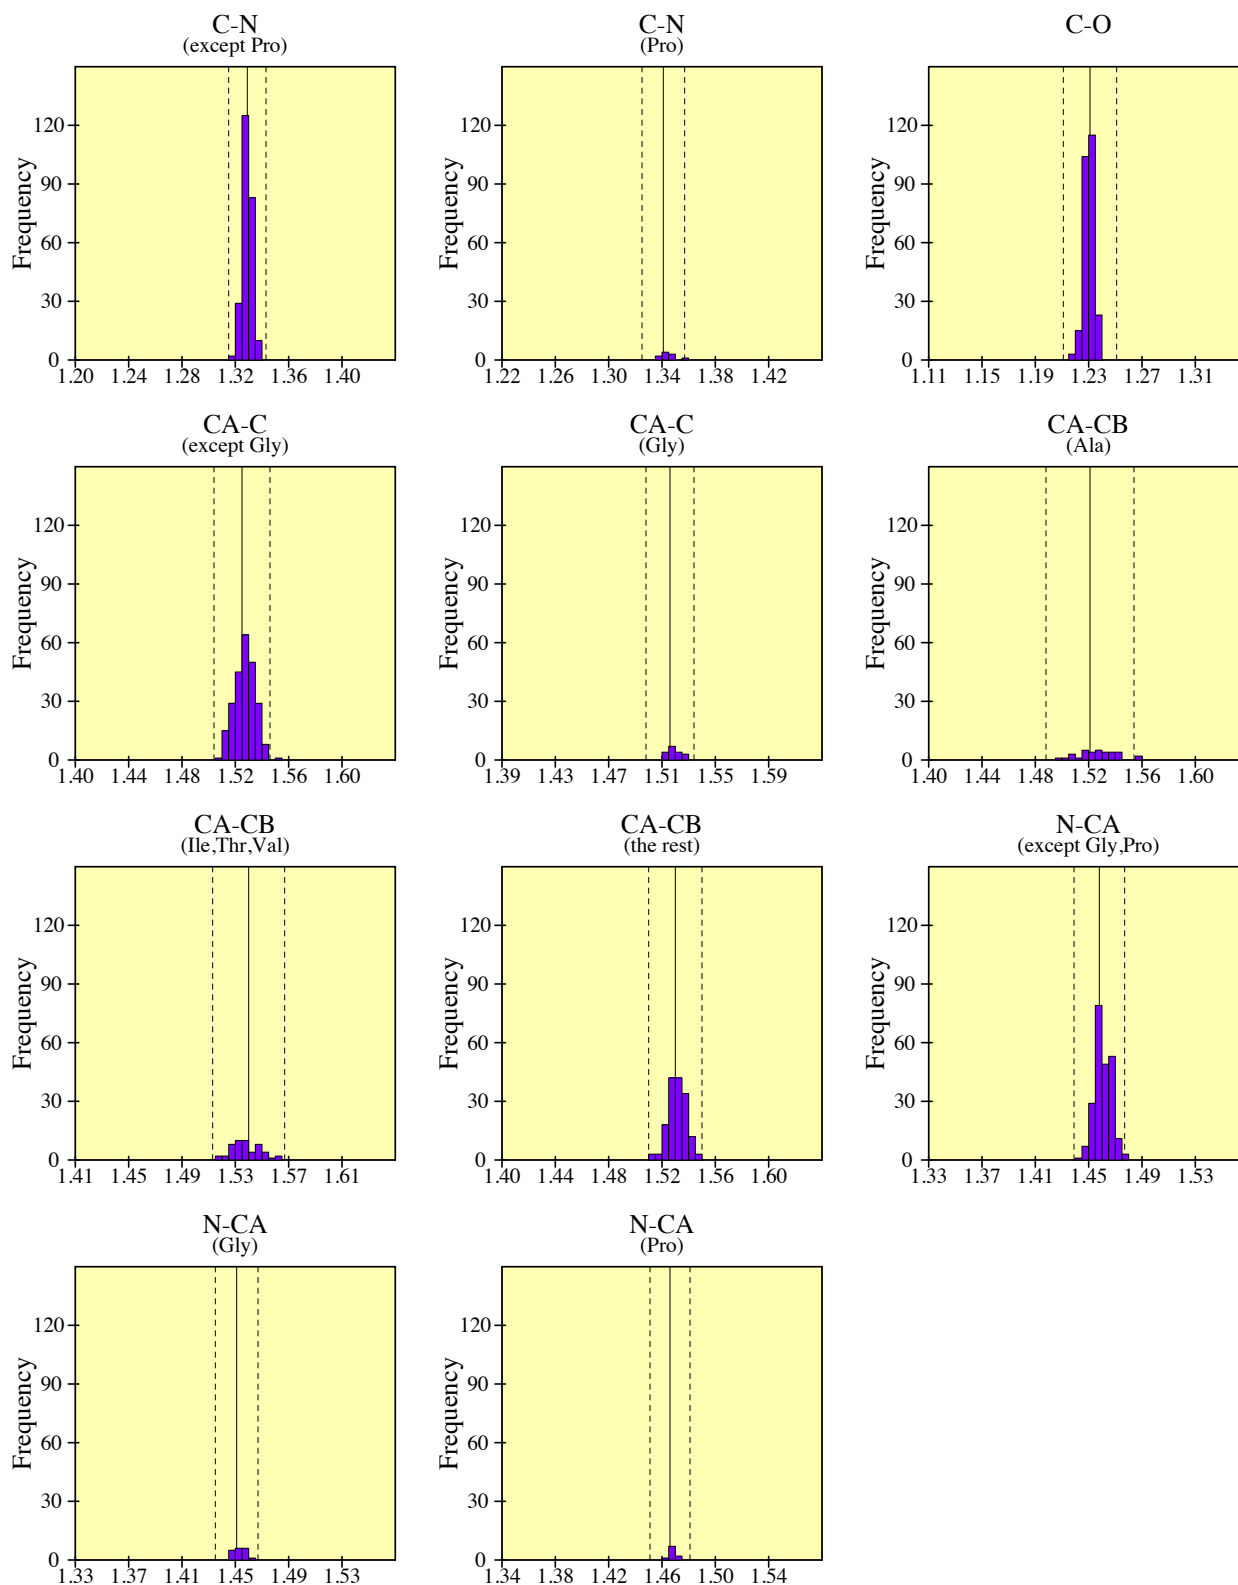

Black bars > 2.0 st. devs. from mean.

Solid and dashed lines represent the mean and standard deviation values as per Engh & Huber small-molecule data.

# Main-chain bond angles

## LPG3 - Chain A

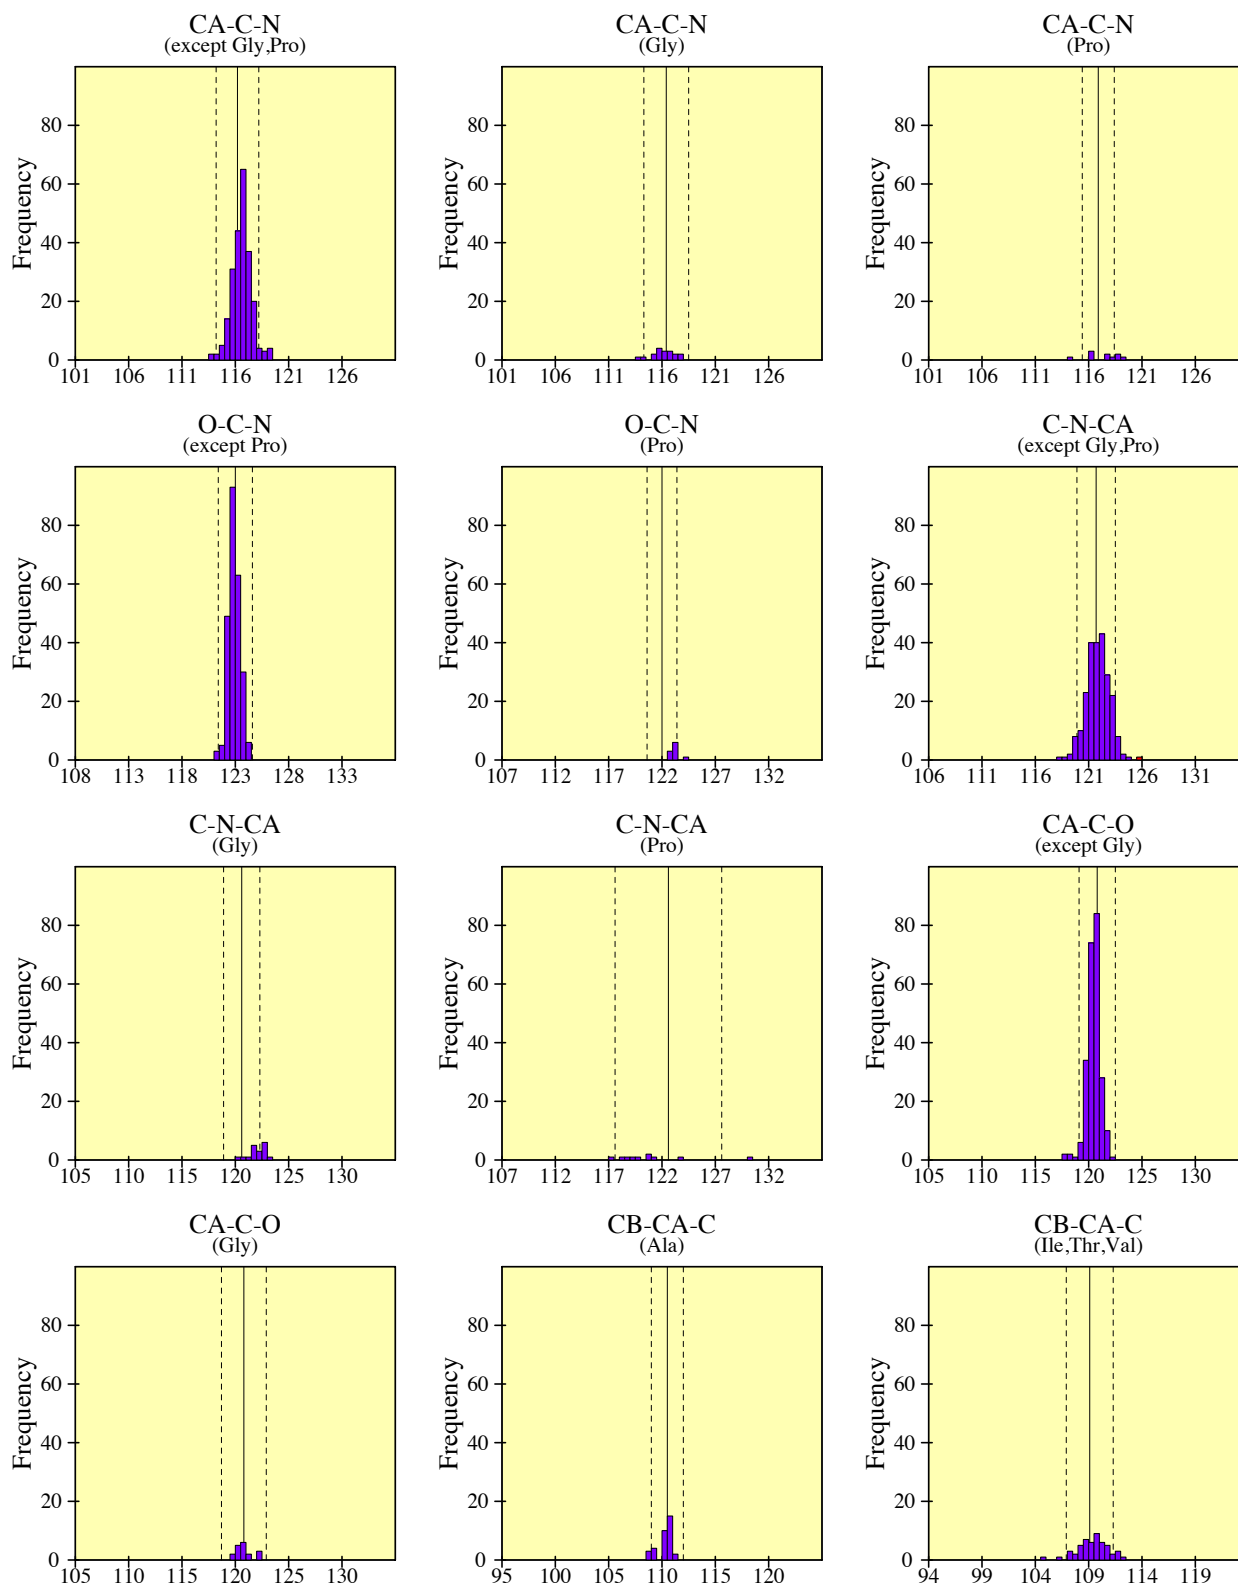

Black bars > 2.0 st. devs. from mean.

Solid and dashed lines represent the mean and standard deviation values as per Engh & Huber small-molecule data.

# Main-chain bond angles

## LPG3 - Chain A

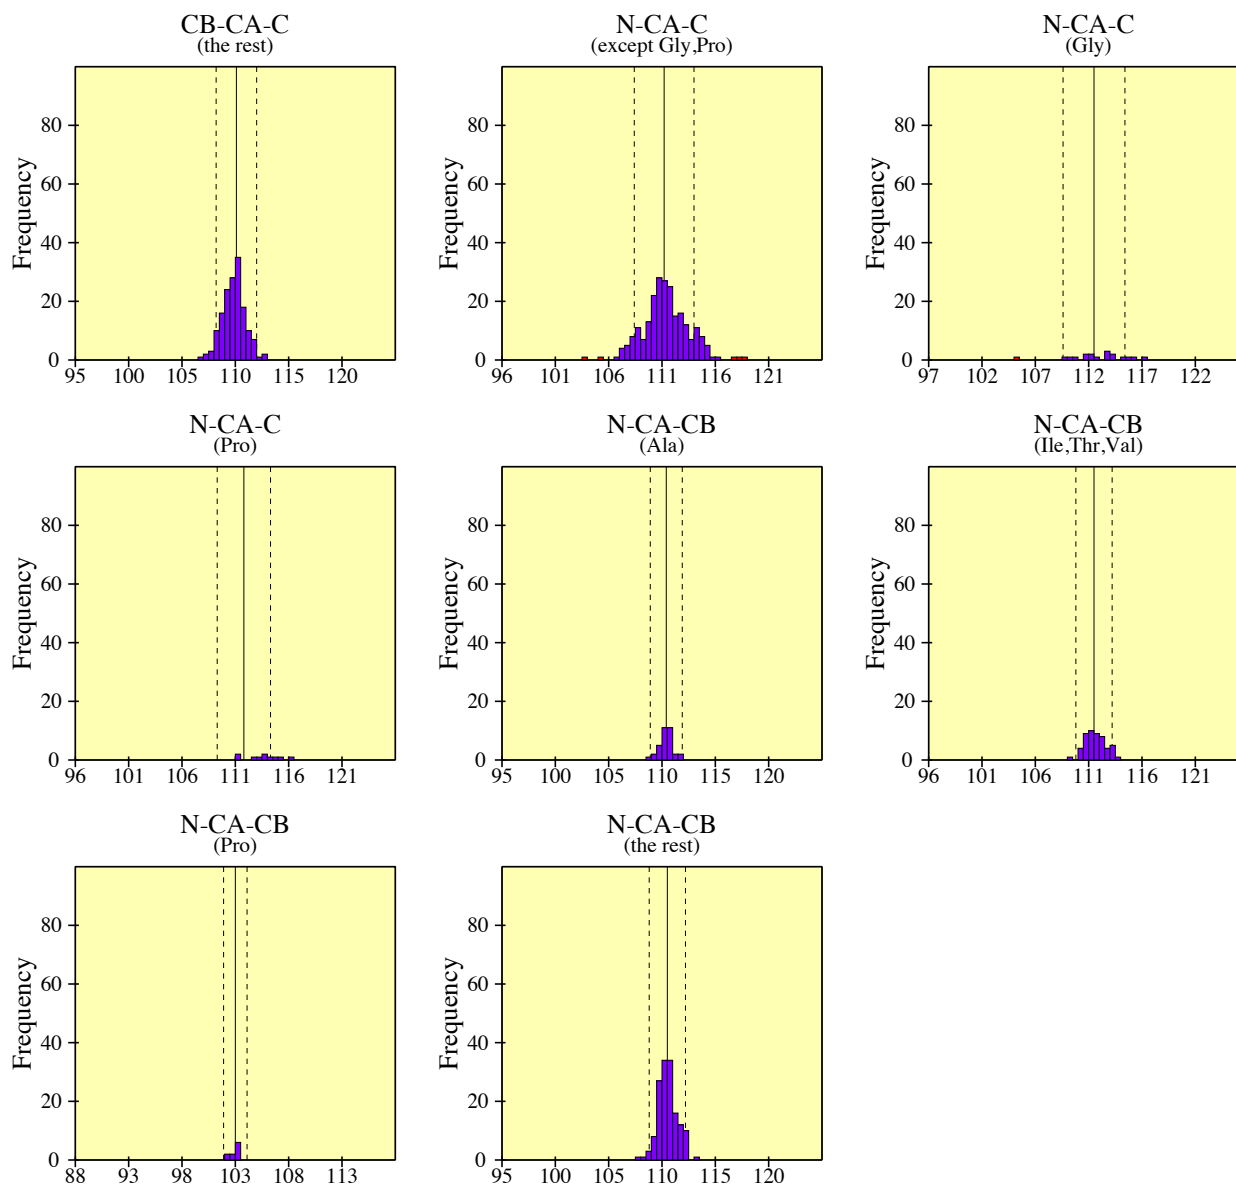

Black bars > 2.0 st. devs. from mean.

Solid and dashed lines represent the mean and standard deviation values as per Engh & Huber small-molecule data.
