# Supplementary material
Source: publisher figshare collection journal article supplement (https://sage.figshare.com/ndownloader/files/11903852)
Supplement: Supplementary file 4 [file 11903852]

Supplementary Table 1:

| <b>Model</b> | <b>1</b> | <b>2</b> | <b>3</b> | <b>4</b> | <b>5</b> | <b>6</b> | <b>7</b> | <b>8</b> | <b>9</b> | <b>10</b> |
|--------------|----------|----------|----------|----------|----------|----------|----------|----------|----------|-----------|
| <b>1</b>     | 0        |          |          |          |          |          |          |          |          |           |
| <b>2</b>     | 1,86     | 0        |          |          |          |          |          |          |          |           |
| <b>3</b>     | 3,45     | 2,24     | 0        |          |          |          |          |          |          |           |
| <b>4*</b>    | 32,65    | 36,78    | 29,36    | 0        |          |          |          |          |          |           |
| <b>5</b>     | 6,75     | 7,98     | 5,34     | 6,32     | 0        |          |          |          |          |           |
| <b>6</b>     | 4,52     | 5,67     | 4,87     | 5,73     | 5,31     | 0        |          |          |          |           |
| <b>7</b>     | 7,87     | 6,98     | 5,76     | 8,65     | 4,32     | 2,32     | 0        |          |          |           |
| <b>8</b>     | 3,68     | 3,28     | 4,56     | 2,98     | 6,79     | 3,85     | 4,23     | 0        |          |           |
| <b>9</b>     | 4,56     | 4,37     | 5,98     | 3,67     | 6,54     | 4,73     | 4,79     | 2,98     | 0        |           |
| <b>10*</b>   | 52,12    | 48,56    | 51,62    | 69,94    | 56,98    | 58,86    | 56,78    | 52,45    | 48,31    | 0         |

\* Models with higher divergence

Supplementary Table 1. Similarity of Top 10 predicted complex models measured by RMSD of amino acids main chain.
